# Supplementary material
Source: publisher figshare collection journal article supplement (https://karger.figshare.com/ndownloader/files/30626505)
Supplement: Supplementary file 1 [file 30626505]

## Supplementary File 1: PRISMA flow diagram

**Records included**

**in analysis**(n=53)

**Records assessed for eligibility**
(n=102)

**Records screened based on title and/or abstract**
(n=168)

**Records identified through PubMed searches**
(n=220)

**Additional records identified through other sources**
(n=13)

**Records after duplicates removed**
(n=168)

**Records excluded, with reasons (n=49)**

- Not relevant to objectives, based on full text (n=36)
- Reviews (primary studies within used if relevant) (n=13)

## Included

## Eligibility

## Screening

## Identification

**Records excluded (n=66)**

- Based on title (n=43)
- Based on abstract (n=23)
